## Particulate matter composition drives differential molecular and morphological responses in lung epithelial cells

Sean M. Engels<sup>1</sup>, Pratik Kamat<sup>2</sup>, G. Stavros Pafilis<sup>1</sup>, Yukang Li<sup>3</sup>, Anshika Agrawal<sup>2</sup>, Daniel J. Haller<sup>4</sup>, Jude M. Phillip<sup>2,5-7\*</sup>, Lydia M. Contreras<sup>1,8\*</sup>

1. McKetta Department of Chemical Engineering, University of Texas at Austin, Austin, Texas, 78712

2. Department of Chemical and Biomolecular Engineering, Johns Hopkins University, Baltimore, Maryland, 21218

3. Department of Biology, Johns Hopkins University, Baltimore, Maryland 21218

4. Department of Chemical and Biomolecular Engineering, North Carolina State University, Raleigh, North Carolina, 27606

5. Institute for Nanobiotechnology, Johns Hopkins University, Baltimore, Maryland, 21218

6. Department of Biomedical Engineering, Johns Hopkins University, Baltimore, Maryland 21218

7. Department of Oncology, Sidney Kimmel Comprehensive Cancer Center, Baltimore, Maryland, 21231

8. Institute for Cellular and Molecular Biology, The University of Texas at Austin, Austin, Texas, USA

**\*Corresponding Authors:** Lydia Contreras and Jude Phillip

**Email:** [lcontrer@che.utexas.edu](mailto:lcontrer@che.utexas.edu) and [jphillip@jhu.edu](mailto:jphillip@jhu.edu)

**Author Contributions:** S.M.E., P.K., J.M.P., and L.M.C. designed the study. S.M.E., P.K., G.S.P., Y.L., A.A., and D.J.H. performed the experiments. S.M.E. and P.K. led analysis of the results. S.M.E. and P.K. wrote the manuscript. S.M.E., P.K., J.M.P., L.M.C., G.S.P., and D.J.H. edited the manuscript. L.M.C. and J.M.P. supervised the study.

**Competing Interest Statement:** The authors declare that they have no competing interests.

## 1 **Abstract**

2 Particulate matter (PM) is a ubiquitous component of indoor and outdoor air pollution that is  
3 epidemiologically linked to many human pulmonary diseases. PM has many emission sources,  
4 making it challenging to understand the biological effects of exposure due to the high variance in  
5 chemical composition. However, the effects of compositionally unique particulate matter mixtures  
6 on cells have not been analyzed using both biophysical and biomolecular approaches. Here, we  
7 show that in a human bronchial epithelial cell model (BEAS-2B), exposure to three chemically  
8 distinct PM mixtures drives unique cell viability patterns, transcriptional remodeling, and the  
9 emergence of distinct morphological subtypes. Specifically, PM mixtures modulate cell viability and  
10 DNA damage responses and induce the remodeling of gene expression associated with cell  
11 morphology, extracellular matrix organization and structure, and cellular motility. Profiling cellular  
12 responses showed that cell morphologies change in a PM composition-dependent manner. Lastly,  
13 we observed that particulate matter mixtures with high contents of heavy metals, such as cadmium  
14 and lead, induced larger drops in viability, increased DNA damage, and drove a redistribution  
15 among morphological subtypes. Our results demonstrate that quantitative measurement of cellular  
16 morphology provides a robust approach to gauge the effects of environmental stressors on  
17 biological systems and determine cellular susceptibilities to pollution.

## 18 Introduction

19

20 Ambient air pollution threatens human health through direct links to chronic illnesses and  
21 premature deaths. High pollution levels are associated with elevated incidences of ischemic heart  
22 disease, lung cancer, aggravated asthma, chronic obstructive pulmonary disease (COPD), stroke,  
23 and adverse birth outcomes(1–6). In 2019, it was estimated that 6.67 million deaths could be  
24 attributed to air pollution exposure worldwide(7). Particulate matter (PM), which consists of  
25 microscopic solids and liquid droplets, is an important component of ambient air pollution. These  
26 particulates and their precursor chemicals are emitted from many natural and man-made sources,  
27 including volcanic activity, burning of biomass, vehicle emissions, coal-burning powerplants, and  
28 other industrial activities(8). However, the molecular mechanisms governing how cells change in  
29 response to air pollution remain poorly understood.

30 Recent studies have identified strong associations between PM size and different biological  
31 responses(9, 10). However, a key challenge in elucidating the health effects of PM exposure is that  
32 PM chemical composition can vary greatly across geographical areas and environments, as there  
33 are various anthropogenic and biogenic contributors that emit different chemical species(11–13).  
34 These inherent geographical differences of PM can impose challenges towards understanding the  
35 different influences at the cellular and molecular levels, since the biological effects can vary with  
36 chemical composition. Studies using lung cell models such as A549, BEAS-2B, or primary airway  
37 epithelial cells have demonstrated the impact that different PM mixtures and pollutants can have  
38 on cellular pathway remodeling(10, 14). For example, in parallel studies a bronchial epithelial cell  
39 model, BEAS-2B, exposed to mixtures of either secondary organic aerosol or aerosolized  
40 formaldehyde showed unique molecular responses and pathway remodeling(15, 16). Additionally,  
41 other studies have investigated the induction of oxidative stress due to particulate matter exposure  
42 and have highlighted unique regulatory pathways that contribute to the pro-inflammatory  
43 response(14, 17).

44 Different exposure methods have also investigated the biological effects of PM including  
45 liquid submerged exposures(18), air-liquid-interface exposures (ALI)(19, 20), and pseudo-air-  
46 liquid-interface exposures(18). It is worth noting that these vary in cost, physiological relevance,  
47 and throughput. Studies have also looked at a variety of environmental pollutants including PM<sub>10</sub>,  
48 PM<sub>2.5</sub>, and PM<sub>0.1</sub> (particulate matter with aerodynamic diameters of less than 10µm, 2.5µm, and  
49 0.1µm, respectively) collected from cities including Beijing, Milan, Seoul and others(21–26).  
50 Organic and aqueous extractions of PM have also been investigated along with individual  
51 components or pollution types including secondary organic aerosols, diesel exhaust particles,  
52 volcanic ash, and metals. However, the results of these studies vary greatly, in part, due to their  
53 use of different cell models, exposure times and protocols, and PM types that are often not fully  
54 characterized. All these factors introduce challenges to drawing meaningful comparisons of the  
55 biological effects of different PM types.

56 Previous studies looking at air-pollution-induced pathway remodeling via transcriptomics  
57 have found changes in regulatory pathways that control cellular morphology, including significant  
58 alterations in cholesterol synthesis pathways of bronchial epithelial cells that result in distinct  
59 morphological changes(16, 27). By extension, these types of studies indicate that a retraction in  
60 cell size could be used as a biomarker of toxicity(16). Overall, cellular and nuclear morphology is  
61 linked to upstream changes in gene expression and cellular dysfunction(28, 29), with significant  
62 pathway remodeling in cell death programs, apoptotic pathways, extracellular matrix (ECM)  
63 interactions, and cytoskeleton structures(29–31). In the context of aging, increases in cell and  
64 nuclear sizes, as well as irregularities in cell shapes associate strongly with fundamental defects  
65 and senescence(32, 33). While longer term pollutant exposures of lung cells are linked to increased  
66 senescence, it is unclear how short-term exposures modulate cellular responses based on  
67 molecular or morphological phenotypes(34).

68 Here, we expose the BEAS-2B human bronchial epithelial cell model to three well-  
69 characterized and compositionally unique PM mixtures available from the National Institute of  
70 Standards and Technology (NIST): Urban (SRM1648a), Fine (SRM 2786) and Diesel Exhaust  
71 (SRM 2975). Exposures were performed at multiple concentrations ranging from 31 to 1000  $\mu\text{g}/\text{mL}$   
72 for 24 hours to investigate the effects of multiple PM types on human lung epithelial cells. Following  
73 exposures, we measured transcriptional changes to identify specific PM-composition-dependent  
74 remodeling of molecular pathways. In parallel, we performed morphological analysis of cells at  
75 baseline and after PM exposures to develop a robust single-cell platform to profile cellular  
76 responses and the emergence of functional subtypes of cells. Together our study provides a multi-  
77 scale approach to quantify molecular and morphological responses to several relevant PM  
78 mixtures. Additionally, we show that cell morphology can encode susceptibility to particulate matter  
79 exposure, offering a new tool for understanding the cellular effects of environmental stressors.

## 80 Results

81

### 82 Cellular viability is differentially affected by unique particulate matter samples

83 To determine the biological effects of different PM compositions on cell viability, we  
84 measured the survival of BEAS-2B cells following exposure to three individual PM mixtures sourced  
85 from NIST (Urban (SRM1648a), Fine (SRM 2786), and Diesel Exhaust (SRM 2975)) to quantify  
86 changes in toxicity to cells. The Urban and Fine samples contain PM collected over extended  
87 periods of time from two different cities, St. Louis, Missouri and Prague, Czech Republic,  
88 respectively. The Diesel Exhaust sample was collected from the exhaust of a diesel-powered  
89 engine. Importantly, these mixtures exhibit major differences in several components; for instance,  
90 the mass fractions of lead, cadmium, and nitro-polycyclic aromatic hydrocarbons (nitro-PAHs) vary  
91 by at least an order of magnitude between at least two of the samples (Table 1). A complete  
92 comparison of reported compositional data can be found in Dataset S1. Interestingly, cadmium and  
93 lead are both highly toxic metals that can be found in air pollution from manufacturing of batteries,  
94 cigarette smoke, metal processing, and production of plastics(8, 35), while nitro-PAHs are primarily  
95 emitted from combustion of diesel fuel and have been shown to have mutagenic and genotoxic  
96 properties(36). Diesel exhaust is a major component of air pollution in urban areas resulting from  
97 the heavy traffic, and diesel engines emit more particles and 10-times higher levels of nitro-PAHs  
98 than gasoline engines(37).

99 To evaluate the effects of PM exposures on cellular viability, we used the alamarBlue™  
100 viability assay. We observed that after cells were exposed to PM for 24 hours (Fig. 1a), cell  
101 populations exhibited PM-type- and concentration-dependent changes in viability (Fig. 1b). For  
102 example, Urban PM induced a steady decrease in viability at concentrations greater than or equal  
103 to 250 $\mu\text{g}/\text{mL}$  ( $p < 0.05$ ). However, Fine PM induced a significant decrease in viability only at the  
104 highest concentration of 1000  $\mu\text{g}/\text{mL}$ . Paradoxically, diesel exhaust PM induced an increase in cell  
105 viability across all concentrations. The exposure concentrations of 125 and 500  $\mu\text{g}/\text{mL}$ , equivalent  
106 to 35.2  $\mu\text{g}/\text{cm}^2$  and 140.8 $\mu\text{g}/\text{cm}^2$  in terms of deposition over cell growth area, were chosen for  
107 further analysis. These concentrations were chosen based on previous analyses indicating that 20  
108  $\mu\text{g}/\text{cm}^2$  could be deposited in the tracheobronchial regions of the lung over a period of 8 hours in  
109 an urban environment(38), ~35.2  $\mu\text{g}/\text{cm}^2$  falls within an expected deposition amount within areas  
110 of the human lung for a 24-hour period in an urban environment, and ~140.8 $\mu\text{g}/\text{cm}^2$  could be  
111 representative of exposure levels in extremely polluted cities.

### 112 Exposure to different PM types and concentrations induce differential DNA damage 113 responses and cell death

114 Interestingly, the alamarBlue™ viability assay did not show decreases in viability for Fine  
115 and Diesel PM exposures across a wide range of concentrations (up to 500  $\mu\text{g}/\text{mL}$ ). To investigate  
116 this further, we profiled the DNA damage responses to PM mixtures. Using confocal microscopy,  
117 we measured the accumulation of the histone phosphorylation  $\gamma\text{H2AX}$  as a marker of double

118 stranded DNA breaks, a precursor to genotoxicity and cell death(39). We found that exposures to  
119 the different PM mixtures at concentrations of 125 or 500  $\mu\text{g}/\text{mL}$  led to differential levels of DNA  
120 damage, with all exposures leading to increases in DNA damage relative to the control, unexposed  
121 cells (Fig. 2a,b).

122 Furthermore, we evaluated whether PM exposures were inducing cell death via apoptosis  
123 or based on non-apoptotic mechanisms. Both apoptotic and non-apoptotic mechanisms are  
124 associated with aberrant levels of DNA damage. To determine the mode of cell death, we incubated  
125 cells with Annexin V (A.V) and Propidium Iodide (P.I.) after exposure to the different PM mixtures  
126 and quantified the levels of apoptotic and dead cells using flow cytometry, as previously used to  
127 investigate the mode of cell death in lung cells exposed to PM mixtures(40).

128 Cells exposed to 125  $\mu\text{g}/\text{mL}$  of all PM conditions exhibited small increases in the population  
129 of dead cells (A.V-/P.I.+) and a decrease in the population of apoptotic cells (A.V+/P.I.- and  
130 A.V+/P.I.+) (Fig. 2c). A.V+/P.I.- indicated cells were in the early stages of apoptosis, while  
131 A.V+/P.I.+ indicate cells are in later stages of apoptosis or dying due to loss of membrane integrity.  
132 In contrast, exposure to 500  $\mu\text{g}/\text{mL}$  concentration of each PM mixture resulted in an increase in the  
133 number of dead cells (A.V-/P.I.+) (Fig. 2c). Representative scatter plots of flow cytometry data from  
134 each condition are shown in Fig. S1. We next compared the trends in the populations of apoptotic  
135 versus dead cells across the different PM mixtures and observed that exposure to different PM  
136 compositions led to different distributions of apoptotic versus dead cells. For instance, exposure to  
137 the Urban PM mixtures resulted in a greater number of dead cells relative to the Fine and Diesel  
138 mixtures. These results corroborate the general pattern in viability observed via the alamarBlue™  
139 assay, with Urban PM inducing the greatest losses of viability, but better captures loss of viability  
140 in the Diesel and Fine conditions (Fig. 1b).

141 The levels of DNA damage are also associated with the levels of observed cell death (Fig.  
142 2d). As shown in Figure 2,  $\gamma\text{H2AX}$  intensity increases with exposure to increasing PM  
143 concentrations for each of the three PM types. Furthermore,  $\gamma\text{H2AX}$  intensity positively correlates  
144 (Pearson Coefficient of  $R=0.94$ ,  $p=0.0014$ ) with the percentage of dead cells (A.V-/P.I.+) found in  
145 the Annexin-V Propidium iodide data for the same exposed populations (Fig. 2d). Taken together,  
146 these data show increases in cell death and DNA damage levels are observed with increasing PM  
147 concentrations. These levels are also dependent on the PM composition, as the three mixtures  
148 show markedly different trends. Additionally, the correlation between cell death and  $\gamma\text{H2AX}$  intensity  
149 points to a framework of DNA damage associated cell death.

#### 150 **Post-exposure transcriptional remodeling of cell populations in response to PM mixtures** 151 **indicates common and unique gene expression activation**

152 The unique differences observed in viability and in the patterns of DNA damage following  
153 PM exposures at 125 and 500  $\mu\text{g}/\text{mL}$  prompted us to investigate whether PM exposures also  
154 induced differential molecular responses. To better understand how the underlying transcriptomic  
155 profiles influence differential viability across PM mixtures, we assessed changes in gene  
156 expression patterns via 3'-TagSeq(41, 42) (Datasets S2-7). This approach takes advantage of the  
157 poly(A) tail on mRNA for sequencing library preparation, allowing the accurate quantification of  
158 protein coding transcripts.

159 We first observed that exposure to Urban and Fine PM mixtures induced significant  
160 changes in the expression of a greater number of mRNA transcripts relative to Diesel Exhaust  
161 under the two PM concentrations tested. Furthermore, the magnitudes of the changes were larger  
162 for cells exposed to Urban and Fine mixtures than those exposed to Diesel Exhaust PM (Fig. 3a-  
163 f). These observations indicate that the Urban and Fine mixtures have a lower threshold for  
164 stimulation of cellular responses. Additionally, the number of genes that were differentially  
165 expressed by each PM type increased with higher concentrations (*i.e.*, 125  $\mu\text{g}/\text{mL}$  versus 500  
166  $\mu\text{g}/\text{mL}$  exposures) (Fig. 3a-f). Moreover, the majority of the genes (at least 67% for each condition)

167 that were up- and down-regulated in the 125 µg/mL conditions were similarly up- and down-  
168 regulated in the 500 µg/mL condition (Fig. S2), indicating consistency in the transcriptional  
169 responses across different concentrations of each PM type, with additional pathway activation at  
170 higher concentrations.

171 Additionally, we observed that four mRNAs encoded by the CYP1A1, CYP1B1, ID1, and  
172 ID3 genes were differentially expressed post-exposure across all conditions (Fig. 3g); two were  
173 overexpressed (CYP1A1 and CYP1B1) and two displayed decreased expression (ID1 and ID3),  
174 relative to expression levels in unexposed control cells. The CYP1A1 and CYP1B1 are members  
175 of the cytochrome P450 family that are involved in the metabolism of endogenous compounds such  
176 as fatty acids and steroid hormones(43). Consistent with our results, these genes are upregulated  
177 in human epithelial lung cell models in response to exogenous polycyclic aromatic hydrocarbons (PAHs)  
178 present in PM(14). These PAHs bind to the cytosolic aryl hydrocarbon receptor (AhR), which then  
179 mediates expression of the cytochromes and promotes a proinflammatory response to induce ROS  
180 production in cells. ID1 and ID3 are inhibitors of DNA binding proteins that are induced by TGF-β  
181 and have been implicated in regulation of senescence, apoptosis, and cell cycle alterations(44).  
182 Moreover, ID1 expression has also been shown to decrease after exposure to coarse PM (PM with  
183 an aerodynamic diameter between 2.5-10 µm)(10), but the roles of these genes have been less  
184 defined in the context of air pollution exposures. Importantly, the increase in expression of the CYP  
185 genes and the decrease in expression of the ID genes suggest that the response to organic cyclic  
186 compounds as well as alteration of the TGF-β regulatory pathways are commonly remodeled by  
187 these unique PM mixtures. This is further supported by the differential expression of additional  
188 TGF-related genes (Fig. 3g). Interestingly, many TGF-β related genes are involved in the regulation  
189 of cell morphology and motility.

190 We next observed that unique mRNAs were significantly differentially expressed only when  
191 cells were exposed to certain PM mixtures, but not others (Fig. 3h,i). For example, TNFAIP6, a  
192 regulator of the ECM, LCAT, a protein involved in extracellular metabolism, and CXCL1, a protein  
193 involved in inflammation, are significantly differentially expressed under only the Fine exposure  
194 conditions. However, genes including DDIT4, a protein induced by DNA damage, MT1E, a protein  
195 involved in the cellular response to cadmium, and ACTN4, an actin binding protein, are differentially  
196 expressed under only the Urban exposure conditions. This indicates that there could be unique  
197 pathway activation that is dependent upon the PM composition.

198 Overall, the gene expression patterns observed in cells exposed to Fine and Urban PM  
199 mixtures exhibit significant pathway remodeling, whereas cells exposed to Diesel Exhaust PM  
200 exhibit less remodeling. Similarly, we observed a dose-dependence in the extent of pathway  
201 remodeling, i.e., more changes with higher PM concentrations. Lastly, we noted that, although  
202 expression of a limited set of four genes was consistent across all conditions (i.e., CYP1A1,  
203 CYP1B1, ID, and ID3), other genes are differentially expressed in a manner that is dependent on  
204 the PM type.

## 205 **Gene Ontology analysis reveals PM-dependent remodeling of apoptosis, motility, and** 206 **morphology pathways**

207 To determine the key remodeled pathways post-exposure and the extent to which they  
208 were remodeled, we performed Gene Ontology (GO) and pathway enrichment analysis. We  
209 performed this analysis using the transcriptomics data from cells exposed to Urban, Fine, and  
210 Diesel Exhaust PM mixtures at 125 and 500 µg/mL (Fig. 3j-l, Fig. S3). The complete list of enriched  
211 GO Terms for each condition can be found in Datasets S8-S13. Using Enrichr(45), we identified 34  
212 pathways that were significantly enriched ( $p_{adj} < 0.01$ ) in cells exposed to the 125 µg/mL  
213 concentration of both Urban and Fine PM mixtures, relative to baseline. We selected 11 non-  
214 redundant pathways to show in Fig. 3j. We observed changes in the expression of genes related  
215 to MAPK cascade (e.g., EDN1, GDF15, TGFB2, ANGPT1, and LIF), epithelial cell proliferation,  
216 (e.g., CDKN1C and EPGN), regulation of apoptosis (e.g., FCMR and CITED2), and cell migration

217 and extracellular matrix organization pathways (e.g., SFRP1 and FGG). It is worth noting that for  
218 cells exposed to Urban and Fine PM at 500  $\mu\text{g}/\text{mL}$ , similar pathways were also significantly  
219 enriched ( $p_{\text{adj}} < 0.01$ ) (Fig. S3, Datasets S11-S13).

220 Interestingly, we observed few differentially expressed genes in cells exposed to the Diesel  
221 Exhaust PM mixture. Only the “response to organic cyclic compound” pathway was significantly  
222 enriched ( $p_{\text{adj}} < 0.01$ ) in cells exposed to all PM types at the 125  $\mu\text{g}/\text{mL}$  concentration. However,  
223 this response appears to be ubiquitous, with the CYP1A1 and CYP1B1 genes increasing in  
224 expression across all conditions post-exposure. Similarly, we identified upregulation of IL1B, which  
225 was upregulated in all conditions except 125  $\mu\text{g}/\text{mL}$  Diesel Exhaust PM.

226 We also identified key genes exhibiting differential expression across both the 125  $\mu\text{g}/\text{mL}$   
227 Urban and Fine PM exposure conditions that contributed to the remodeling of multiple pathways  
228 (Figs. 3i-j, S4). For example, IL1A, IL1B, and TGFB genes were part of several Gene Ontology-  
229 defined pathways that comprise cytokine signaling cascade and TGF- $\beta$  signaling. Other genes  
230 involved across many pathways include GAS6, which is involved in cell growth and migration and  
231 cytokine signaling, and PTK2B, a protein involved in the activation of MAPK signaling and  
232 reorganization of the actin cytoskeleton. These genes are present in many of the most significantly  
233 altered pathways, highlighting their importance in the biological response to PM exposure.

234 Lastly, we observed that several exclusive GO terms were significantly enriched ( $p_{\text{adj}} < 0.01$ )  
235 in cells post-exposure to Urban PM at both concentrations (125 and 500  $\mu\text{g}/\text{mL}$ ) (Fig. 3k, Fig. S3)  
236 that included unique responses to metal ions. Examples of these pathways include response to  
237 cadmium ion, copper ion, and zinc ion, which encompass mRNAs encoded by the MT1 family  
238 genes (MT1G, MT1E, MT1F, and MT1M). The patterns of gene expression changes involved in  
239 the regulation of metal ions are consistent with the increase in metal composition (*i.e.*, cadmium)  
240 in the Urban PM mixture, relative to the other mixtures tested (Table 1). Similar to the 125  $\mu\text{g}/\text{mL}$   
241 Urban exposure, at the 500  $\mu\text{g}/\text{mL}$  Urban condition, the top significantly enriched GO term is  
242 response to metal ion, again indicating the importance of the increased metal concentrations in the  
243 Urban PM sample relative to Fine and Diesel Exhaust.

244 Taken together, these data indicate that cells differentially regulate their gene expression  
245 patterns in a PM composition dependent manner. However, pathways related to cell morphology,  
246 and extracellular matrix remodeling seem to be broadly shared across all PM exposure conditions,  
247 with pathways related to apoptosis shared across the Urban and Fine conditions.

## 248 **Particulate matter compositions drive the emergence of morphological subtypes post-** 249 **exposure**

250  
251 Since unique PM mixtures drive differential responses, particularly in apoptosis,  
252 cytoskeletal structure, and ECM-related pathways, we wondered whether these responses could  
253 be captured by changes in cellular morphologies across cell populations. Using our BEAS-2B cell  
254 line model, we exposed cells to the same PM mixtures at the same concentrations and exposure  
255 times. After exposure, cells were fixed and stained for F-Actin (488-Phalloidin), DNA (DAPI), and  
256  $\gamma\text{H2AX}$  (anti- $\gamma\text{H2AX}$  (phospho-S139) antibody) (Fig. 4a,b). The Phalloidin and DAPI stains were  
257 used to delineate the cell and nuclear boundaries, and  $\gamma\text{H2AX}$  to quantify the extent of persistent  
258 DNA damage. For each cell and nuclear boundary, we computed 33 discrete parameters describing  
259 features related to the sizes and shapes of individual cells (Table S1). Across all conditions we  
260 analyzed ~13,000 single cells. To identify whether BEAS-2B cells exhibited morphological subtypes  
261 that changed after PM exposure, we performed dimensional reduction and clustering analyses on  
262 cells analyzed across all conditions. Using a combination of k-means clustering and Uniform  
263 Manifold Approximation and Projection (UMAP), we identified 10 distinct morphology clusters, each  
264 having unique cellular and nuclear morphological profiles (Fig. 4c,d). Furthermore, these ten  
265 morphological clusters can be further grouped into three cluster groups (CG), with morphology

266 clusters 1, 2, and 5 belonging to CG1, morphology clusters 3, 4, and 6, belonging to CG2, and  
267 morphology clusters 7-10 belonging to CG3 (Fig. S5).

268 Next, we asked whether cells exposed to both low (125  $\mu\text{g}/\text{mL}$ ) and high (500  $\mu\text{g}/\text{mL}$ )  
269 concentrations of each PM mixture exhibited differential abundance of cells across each  
270 morphology cluster. Upon comparison, we observed pronounced shifts in the abundance of cells  
271 per morphology cluster in a PM-dependent manner (Figs. 4e-i and S6). Specifically, when  
272 compared with unexposed conditions, cells exposed to 500  $\mu\text{g}/\text{mL}$  of Urban and Fine PM exhibited  
273 higher fractions of cells in clusters 9 and 10, which describe smaller, more rounded morphologies  
274 (Fig. 4g-i). However, cells exposed to 500  $\mu\text{g}/\text{mL}$  of Diesel PM exhibited higher fractions of cells in  
275 clusters 4 and 8, which describe larger, more elongated cell morphologies (Fig. 4f,i). Based on the  
276 observed fractional redistributions among morphology clusters per condition, we computed the  
277 Shannon entropy as a way to estimate cellular heterogeneity(46). Although cells redistributed  
278 among morphology clusters per PM conditions, only cells exposed to Urban 500  $\mu\text{g}/\text{mL}$  showed a  
279 pronounced decrease in heterogeneity relative to unexposed control cells (Fig. 4i).

280 Taken together, our results indicate that cells exposed to different PM mixtures drive  
281 fractional redistributions among cellular morphology clusters in a PM-dependent manner.  
282 Furthermore, the differential localization of cells exposed to Urban PM (small, more rounded  
283 morphologies) and Diesel PM (larger, more elongated morphologies) point out that these PM  
284 mixtures are likely driving unique responses based on the underlying compositions. Lastly, these  
285 results suggest the potential utility of cell morphology cluster profiles to denote functional subtypes  
286 in pre- and post-exposed cells.

### 287 **Morphological clusters are further defined based on the extent of persistent DNA damage**

288 Given that cells exposed to both Urban and Fine PM exhibited a higher fraction of cells  
289 with smaller, more rounded cell morphologies (Fig. 4g,h) and decreased viability relative to  
290 unexposed cells (Fig. 1b), we investigated whether morphology clusters were associated with  
291 persistent DNA damage. Since each cell was co-stained for  $\gamma\text{H2AX}$ , we computed the extent of  
292 DNA damage based on the total nuclear abundance of phosphorylated-H2AX ( $\gamma\text{H2AX}$ ). Comparing  
293 cells from all exposure conditions, we observed a significant increase in the  $\gamma\text{H2AX}$  content for cells  
294 exposed to 500  $\mu\text{g}/\text{mL}$  Urban PM relative to unexposed control cells. Furthermore, to test whether  
295 cells in different morphology clusters exhibited different levels of DNA damage, we pooled cells  
296 within each morphology cluster across all conditions and quantified the levels of  $\gamma\text{H2AX}$ .  
297 Interestingly, we found that cells belonging to clusters 9 and 10 had the highest levels of  $\gamma\text{H2AX}$   
298 (*i.e.*, high DNA damage), with cluster 4 exhibiting the lowest level of damage (Fig. 4j). These results  
299 suggest that the identified cell morphology clusters could be further defined based on the extent of  
300 DNA damage and susceptibility to cell death after PM exposure.

### 301 **Cadmium drives morphological shifts among functional clusters after PM exposures**

302 To further test the hypothesis that the chemical compositions of the PM mixtures drive  
303 specific shifts among morphological clusters (*i.e.*, smaller, rounder, and less viable cells), we  
304 systematically supplemented our PM mixtures with different concentrations of cadmium chloride  
305 (0-25 $\mu\text{M}$ ) and lead acetate (0-250 $\mu\text{M}$ ) that mimic those used in other studies(47, 48). We selected  
306 cadmium (Cd) and lead (Pb), due to their variable concentrations across different PM mixtures  
307 (Table 1), and the pronounced shifts in both the viability and the morphological shifts when cells  
308 were treated with Urban PM (Urban PM has the highest concentration of Cd in the tested PM  
309 mixtures). First, we observed a significant decrease ( $p \leq 0.05$ ) in viability with increasing levels of  
310 cadmium chloride supplementation across all conditions tested (Figs. 5a, S7). In contrast, cells  
311 exposed to PM mixtures supplemented with lead acetate resulted in little to no change in viability  
312 (Fig. S8).

313 Evaluating the morphological effects of cells exposed to increasing  $\text{CdCl}_2$  concentrations  
314 across all PM mixtures (Fig. 5b-h), we observed a general tendency towards smaller, rounded



315 morphologies described by clusters 9 and 10. Cells exposed to 125  $\mu\text{g}/\text{mL}$  Urban PM and 15 $\mu\text{M}$   
316 Cd resembled the distributions of 500  $\mu\text{g}/\text{mL}$  Urban either alone or with 5 or 15 $\mu\text{M}$  cadmium  
317 supplementation (Figs. 5c,d and S9b,c). For cells exposed to 125  $\mu\text{g}/\text{mL}$  of Fine PM, 15 $\mu\text{M}$   
318 cadmium supplementation led to a great shift relative to the 5 $\mu\text{M}$ . However, in the 500  $\mu\text{g}/\text{mL}$  Fine  
319 PM conditions, even at 5 $\mu\text{M}$  we observed a shift towards clusters 9 and 10, with 500  $\mu\text{g}/\text{mL}$  Fine  
320 PM with cadmium supplementation resembling the 500  $\mu\text{g}/\text{mL}$  Urban PM conditions (Figs. 5e,f and  
321 S9d,e). Lastly, cells exposed to 125  $\mu\text{g}/\text{mL}$  Diesel PM with 15 $\mu\text{M}$  cadmium exhibited a bi-phasic  
322 shift in the abundance of cells among clusters, with 33.9% of cells shifting towards clusters 9 and  
323 10. However, cells exposed to 500  $\mu\text{g}/\text{mL}$  of Diesel and 15 $\mu\text{M}$  cadmium exhibited a similar shift  
324 towards clusters 9 and 10 (30.4% of cells), despite the increased PM concentration (Fig 5g,h).

325 Collectively, our data indicates that the differential abundance of cadmium in the different  
326 PM mixtures may drive differential toxicity among PM mixtures. Importantly, these observed  
327 correlations between increased PM toxicity (lower viabilities with cadmium supplementation) and  
328 distinct morphological redistributions among cell populations suggest the potential for predicting  
329 the toxicity and susceptibility of cells to different PM mixtures using their morphologies.

330

### 331 **Single cell morphology predicts susceptibility to Urban PM exposures**

332 Since cells exhibited unique morphological phenotypes and responses to PM exposures,  
333 we wondered whether cellular morphologies encoded resilience or reduced susceptibility to PM  
334 exposure at the single-cell level. To test whether the starting morphologies of cells associated with  
335 the response to PM exposure, we isolated single-cell clones from the parental BEAS-2B cell line.  
336 Seeding a single cell per well of a 96 well plate, we generated twelve single-cell clones. Analyzing  
337 the morphologies of each clone, we did not observe any clone localizing specifically to one  
338 morphology cluster (Fig. 4a). However, when separating the individual morphological clusters into  
339 the three cluster groups (CG1, CG2, CG3), we observed that some clones occupied primarily one  
340 or multiple of the three cluster groups (Figs. 6a-c, S10a, and S11). As expected, when we compared  
341 the cellular heterogeneities of the twelve clones relative to the parental, we observed an overall  
342 reduction in the overall Shannon entropy for each of the clones, with clones 7 and 1 having the  
343 lowest heterogeneity (Fig. S12).

344 To further test the hypothesis that the starting cellular morphologies governed the response  
345 to PM mixtures we exposed all clones to the Urban PM mixture at 125 and 500  $\mu\text{g}/\text{mL}$  for 24 hours.  
346 To illustrate unique baseline morphologies, we selected the parental and three clones that exhibited  
347 differential abundance of cells within the three morphological cluster groups. Specifically, at  
348 baseline the parental line had a similar abundance of cells across all three cluster groups, clone-7  
349 was highly abundant for cells in CG1, clone-8 was highly abundant in CG2, and clone-11 was highly  
350 abundant in both CG1 and CG2 (Fig. 6c). Based on these starting morphologies we tested the  
351 cellular responses to Urban PM exposures (both 125 and 500  $\mu\text{g}/\text{mL}$ ).

352 After exposure, single cell clones showed differences in morphological distributions. For  
353 the parental and isolated clonal populations, cells exposed to 500  $\mu\text{g}/\text{mL}$  of Urban PM resulted in  
354 a drastic shift towards CG3 and more specifically morphology clusters 9 and 10. However, the  
355 major differences as a function of baseline morphologies were observed in the cells exposed to  
356 125  $\mu\text{g}/\text{mL}$  of Urban PM (Fig. 6d-g, Fig. S10b). For the parental, clone-7 and clone-11 populations,  
357 there were very little shifts in the abundance of cells within the cluster groups, as shown by the  
358 significant overlap of contours from control (unexposed) and the 125  $\mu\text{g}/\text{mL}$  conditions (Fig. 6d,e,g).  
359 Interestingly, for clone-8, at 125  $\mu\text{g}/\text{mL}$  Urban PM there was a significant shift towards CG3  
360 (specifically clusters 9 and 10). These results suggest that c8 may be more susceptible to Urban  
361 PM relative to clone-7 and clone-11 (Fig. 6f). To further test this notion of susceptibility, we  
362 evaluated whether DNA damage responses contributed to the susceptibility. For cells in the  
363 parental, clone-7, and clone-11 populations there was low expression of  $\gamma\text{H2AX}$  which increased  
364 significantly at 500  $\mu\text{g}/\text{mL}$  of Urban PM, indicating increasing DNA damage relative to baseline.

365 However, clone-8 exhibited high  $\gamma$ H2AX signal at baseline ( $>2.4x$  compared to the parental,  
366  $p<0.001$ ), with a large increase at both concentrations of Urban PM ( $p<0.001$ ) (Fig. 6 h-j).

367 Taken together, these results point to the notion that baseline morphologies encode  
368 susceptibility to Urban PM exposure, and generally that baseline cell morphology profiles can be  
369 used as predictors/biomarkers of PM-induced responses. Clones with a high abundance of cells in  
370 CG1 were most resilient to Urban PM, while clones having a high abundance of cells in CG2 and  
371 CG3 demonstrated increasing susceptibility to Urban PM. Lastly, susceptibility to Urban PM  
372 exposures seem to be influenced by the baseline levels of DNA damage.

## 373 Discussion

374

375 In this study, we demonstrate a multi-scale approach to characterize the unique differences  
376 in cellular response to three PM mixtures using molecular and quantitative morphological analyses.  
377 We further investigated morphological variations across populations of unexposed and PM-  
378 exposed cells to show that cellular morphology encodes susceptibility to Urban PM exposures and  
379 provides mechanistic insights into variable responses across cell populations. Additionally, we  
380 show that these responses are dependent on the composition of the PM mixture, for instance,  
381 abundance of cadmium can drive unique cellular transcriptional responses and morphological  
382 changes.

383 With the emergence of single-cell technologies and deep-learning tools, there has been a  
384 tremendous acceleration in the capacity to quantify and analyze specific cell states and behaviors  
385 across cell populations(49–51). Specifically, analysis of biophysical properties, such as motility and  
386 morphology, offer an efficient method to discretize functional subtypes of cells(32, 52, 53). In this  
387 work we profile the single-cell morphological changes after exposure to various PM mixtures to  
388 quantify cellular responses and identify cellular properties that are associated with cellular  
389 susceptibility to pollutants. Three major and novel findings of this work include the following: First,  
390 we identified that although there is a common transcriptomic response to PM in the activation of  
391 the P450 family cytochromes, as shown previously(14, 54), the degree of pathway remodeling is  
392 dependent on the PM composition and concentration of exposure. Second, we show cell  
393 morphology is a strong indicator of response to differential PM exposure. Third, we used single cell  
394 clones to show that specific starting morphologies can encode susceptibility to air pollution  
395 exposure. Collectively, our findings show that cell morphology has the potential to be used as a  
396 biomarker for environmental risk assessment (Fig. 7).

397 With the development of single-cell technologies, in both transcriptomics and  
398 morphological contexts, and advances in RNA fluorescence *in situ* hybridization (FISH) techniques,  
399 further studies could be performed to more directly link the expression of different transcripts with  
400 morphological features of individual cells. Additionally, the use of primary cells in a more realistic  
401 extracellular matrix environment and the testing of additional PM mixtures could further improve  
402 the biological context of future work. Lastly, the use of live-cell imaging to monitor cellular changes  
403 over time could lead to a better understanding of stability of morphological patterns which would  
404 help better understand susceptibility.

405 Taken together, our data begins to elucidate how different PM mixtures drive unique  
406 changes in morphological and transcriptional signatures, and individual cells within a population  
407 have differing levels of susceptibility, encoded for in their morphologies. This knowledge could  
408 provide a better understanding of how components of particulate matter such as cadmium and  
409 other metals drive PM toxicity. Furthermore, our findings could facilitate the development of a  
410 morphology-based method for characterizing an individual's risk to air pollution exposure.

411

412

413

## 414 **Materials and Methods**

415

### 416 **Cell Culture**

417 BEAS-2B cells (ATCC CRL-9609) were cultured from cryopreserved stocks in collagen-  
418 coated T-75 culture flasks according to ATCC guidelines. Briefly, cells were seeded at 3,000  
419 cells/cm<sup>2</sup> and cultured in 23mL of BEGM Bronchial Epithelial Cell Growth Medium (Lonza, CC-  
420 3170), omitting the addition of the gentamicin-amphotericin aliquot to the medium, as  
421 recommended by ATCC. Cells were grown at 37°C in a humidified incubator with a 5% CO<sub>2</sub>  
422 atmosphere, and complete media exchanges were performed every 48 hours. After approximately  
423 4 days, the cultures reached ~70% confluency, and cells were sub-cultured into 6-well or 96-well  
424 plates coated with Type 1 collagen (Advanced BioMatrix, Cat#5005), and allowed to attach to the  
425 growth surface for 24 hours prior to exposure to particulate matter.

### 426 **Particulate Matter Exposure**

427 The BEAS-2B cells were exposed to three particulate matter mixtures collected from  
428 different sources that were purchased from NIST, Urban Particulate Matter (SRM 1648a), Fine  
429 Atmospheric Particulate Matter (SRM 2786), and Diesel Exhaust Particulate Matter (SRM 2975).  
430 Just prior to the start of the exposures, the three PM mixtures were weighed using an analytical  
431 balance and suspended in sterile DI H<sub>2</sub>O in 10mg/mL stock solutions. The suspensions were  
432 sterilized by UV irradiation for 30 minutes as done previously(40). Serial dilutions were performed  
433 with BEGM medium to reach the tested concentrations between 1000µg/mL and 31µg/mL. For  
434 exposures that contained supplements of cadmium, cadmium chloride was dissolved in DI H<sub>2</sub>O and  
435 filter sterilized prior to being added to the PM mixtures at 1000x dilutions. To begin the exposures,  
436 media from the well plates was removed and replaced with equal volumes PM-containing media  
437 for exposed cells or fresh media for unexposed control cells. The cells were incubated at 37°C in a  
438 humidified incubator with a 5% CO<sub>2</sub> atmosphere for a 24-hour exposure period prior to downstream  
439 analysis.

### 440 **AlamarBlue™ assay**

441 BEAS-2B cells were seeded in 96 well plates at a density of 10,000 cells/well. 24 hours  
442 later, the cells were exposed to PM mixtures at concentrations ranging from 31-1000 µg/mL as  
443 described above with n=7 replicates per condition. Following a 24h exposure period, the media  
444 containing the PM was removed and 100µL of fresh BEGM containing 10% alamarBlue™  
445 (Invitrogen, DAL1025) by volume was added to each well. Cells were then incubated at 37°C for 2  
446 hours in the dark. Following this incubation, the fluorescence of each well was measured (Ex.  
447 560/Em. 590) using a BioTek Cytation3 microplate reader. The fluorescence readouts correspond  
448 to cell metabolic activity and were normalized to the readings from unexposed control cells after  
449 performing background correction by subtracting the fluorescence of wells containing only the  
450 alamarBlue™-BEGM mixture.

### 451 **Annexin V – Propidium Iodide Flow Cytometry**

452 In this assay, levels of the FITC-labeled Annexin V protein indicate apoptosis as the A.V  
453 protein binds with high affinity to the phosphatidylserine that is translocated from the inner side of  
454 the cell membrane to the outer side. Likewise, levels of propidium iodide (P.I.), which fluoresces  
455 upon binding DNA in cells that have ruptured or become permeable, indicate cell death or cells that  
456 are in the latest stages of apoptosis(55, 56). The preparation of cells for flow cytometry was  
457 conducted according to established protocols(55). Briefly, following the completion of PM  
458 exposures using n=3 replicates, culture media was collected and put on ice to recover detached  
459 cells. Adherent cells were trypsinized and combined with the collected culture media. The combined  
460 cells were washed twice with cold PBS before proceeding with Annexin V-FITC and propidium  
461 iodide staining of 250,000 cells per sample using an eBioscience™ Annexin V Apoptosis Detection

462 Kit (ThermoFisher, 88-8005-72). Prepared samples were analyzed on a Sony Biotechnology  
463 MA900 Cell Sorter available through the Center for Biomedical Research Support at UT Austin. At  
464 least 10,000 cells per replicate were analyzed for Annexin V binding and propidium iodide  
465 incorporation.

#### 466 **Cell Staining and Imaging**

467 Following exposure, cells adhered to cover glass coated with Type 1 collagen (Advanced  
468 BioMatrix, Cat#5005) were washed with prewarmed PBS for 5 minutes then fixed by incubation for  
469 15 minutes at 37°C in a freshly prepared, methanol-free 4% formaldehyde solution in PBS. Cells  
470 were rinsed 3x with PBS before being permeabilized by incubation in a 0.1% Triton-X PBS solution  
471 for 4 min. Cells were again rinsed 3x with PBS and then blocked with 1% BSA in PBS for 20 minutes  
472 at room temperature. Cells were incubated with a 1:400 dilution of a recombinant anti- $\gamma$ H2AX  
473 (phosphoS139) antibody (Abcam, ab81299) overnight at 4°C to visualize the DNA damage  
474 biomarker. The next day, cells were washed 3x with PBS for 5 min and then incubated with a 1:250  
475 dilution of a fluorescently-tagged secondary antibody (Goat Anti-Rabbit IgG H&L (Alexa Fluor®  
476 488) (Abcam, ab150077)) for 1h at RT. Cells were then rinsed 3x with PBS and stained with Alexa  
477 Fluor™ 594 Phalloidin (Invitrogen, A12381) and Invitrogen™ NucBlue™ Fixed Cell  
478 ReadyProbes™ Reagent (DAPI) (Invitrogen, R37606) according to the manufacturers' protocols to  
479 allow visualization of the F-actin structure and nuclei, respectively. Microscopy slides were then  
480 assembled using ProLong™ Gold Antifade Mountant (Invitrogen, P36930) and were sealed with  
481 clear nail polish. Slides were stored at 4°C until imaging.

482 Fluorescent images were acquired with a Leica Stellaris 5 Confocal Microscope at 20X  
483 resolution using 3 laser lines (405 Diode: DAPI Nuclear Stain, 488 Diode: Alexa Fluor® 488  
484 secondary antibody targeting  $\gamma$ H2AX, 647 Diode: Phalloidin/Actin Stain). Individual Nuclei/Cell  
485 Boundaries were segmented with Cell Profiler™ (57) in combination with in-house curation  
486 pipelines to ensure well-segmented single cells. Briefly, an immunofluorescence-focused  
487 segmentation algorithm used the DAPI stain to delineate the nucleus shape and the Phalloidin stain  
488 to delineate the general cell shape. Approximately 13,000 single cells spanning all exposure  
489 conditions were procured for this work with an additional 40,000 cells analyzed for single cell  
490 clones.

#### 491 **Data Processing and Morphological Analysis**

492 33 key morphological parameters were extracted from each individual cell using a Cell  
493 Profiler™ morphological analysis pipeline (**Table S1**). In order to compare morphological  
494 parameters of different scales to understand population variance, all morphological parameters  
495 were independently log normalized. This “normalized” morphological parameter dataset was  
496 subsequently used to construct a 2D-Uniform Manifold and Projection (UMAP) space(58). UMAP  
497 is a nonlinear dimensionality reduction algorithm that seeks to capture the structure of high  
498 dimensional data in a lower-dimensionality space (for this work, the 33-vector space was simplified  
499 down to two). Each point in the UMAP space represents an individual cell whose morphological  
500 parameters have been transformed and projected onto the 2D-UMAP space. k-means clustering,  
501 an unsupervised clustering method, was used to identify distinct morphological groups within the  
502 cell dataset from the log-normalized dataset. An optimal number of clusters, ten, was calculated by  
503 a plateau in the inertia and silhouette values of the k-means algorithm (**Fig. S13**). To quantify  
504 morphological heterogeneity, the Shannon entropy for each PM exposure condition was calculated  
505 using the k-means clusters as follows.

506

$$S = \sum_{i=1}^{10} -p_i \cdot \log(p_i)$$

507 Where  $S$  is the Shannon entropy (greater magnitude signifies a more heterogeneous  
508 population) and  $p_i$  is the fraction of the population that is in morphological cluster  $i$ (52). For single  
509 cell cloning analysis, larger morphological cluster groups were created to identify overarching  
510 morphological themes of the k-means clusters. Briefly, ward-based clustering was performed on  
511 the average morphological signature across each k-means cluster, and the analysis identified 3  
512 morphological groups that encompassed the k-means clusters.

513  $\gamma$ H2AX content per cell was analyzed through the mean nuclear intensity of the fluorescent  
514 488 channel. Specifically, the summation of the pixel values (normalized to range from 0-1) of the  
515 488 channel was divided by the pixel area of the encompassing nuclei. The resulting mean  $\gamma$ H2AX  
516 expression was then layered across the UMAP manifold and analyzed per cluster. Approximately  
517 13,000 individual cells encompassing all PM exposures were analyzed for the morphological  
518 analysis.

### 519 **Single Cell Cloning and Live-Cell Imaging**

520 Single cells of the BEAS-2B cell line were isolated using a Sony Biotechnology MA900 Cell  
521 Sorter available through the Center for Biomedical Research Support at UT Austin. Individual cells  
522 were sorted into a 96-well plate and allowed to proliferate. Media exchanges of BEGM were  
523 performed every 48 hours. Cell populations were expanded to collagen coated 24-well plates, 6-  
524 well plates, and finally T-75 flasks before freezing cells to create multiple clonal populations. Clonal  
525 populations were then similarly used in experiments as the parental BEAS-2B population as  
526 described above. Approximately 40,000 single cells spanning all clones and urban exposure  
527 conditions were analyzed.

### 528 **3'-Tag RNA Sequencing**

529 BEAS-2B cells were cultured and exposed to PM as described above. Following the  
530 completion of 24h exposures to the three PM types at two concentrations (125 and 500  $\mu$ g/mL),  
531 RNA extraction was immediately performed on  $n \geq 4$  replicates by lysing cells with TRIzol™ Reagent  
532 (Invitrogen, 15596026). The RNA underwent DNase I treatment and was purified using a Direct-  
533 zol RNA Miniprep Kit (Zymo Research, R2052) according to manufacturer protocol. The purity of  
534 the RNA was confirmed using a Nanodrop 2000 Spectrophotometer (Thermo Scientific), and RNA  
535 concentration was determined using a Qubit™ 4 Fluorometer (ThermoFisher) RNA Broad Range  
536 Assay Kit (ThermoFisher, Q10210). Prior to library preparation, RNA quality was determined using  
537 an Agilent Bioanalyzer and all samples used for sequencing had a RIN score  $>8.80$ . The RNA was  
538 submitted to the University of Texas Genomic Sequencing and Analysis Facility for 3' RNA based  
539 library preparation and sequencing based on previously published protocols(41, 42). Libraries were  
540 quantified using the Quant-it PicoGreen dsDNA assay (ThermoFisher) and pooled equally for  
541 subsequent size selection at 350-550bp on a 2% gel using the Blue Pippin (Sage Science). The  
542 final pools were checked for size and quality with the Bioanalyzer High Sensitivity DNA Kit (Agilent)  
543 and their concentrations were measured using the KAPA SYBR Fast qPCR kit (Roche). The pooled  
544 libraries were sequenced on a NovaSeq6000 (Illumina) and a sequencing depth of 4.5 million reads  
545 per sample was achieved with single-end, 100-bp read length. Raw sequencing data is available  
546 at the National Center for Biotechnological Information (NCBI) Short Read Archive (SRA) under  
547 BioProject Accession no. PRJNA954385.

### 548 **Differential Gene Expression Analysis**

549 Following sequencing, the raw reads were preprocessed to remove adapter contamination  
550 and trim the unique molecular identifier (UMI) barcodes, remove duplicates, and remove poor  
551 quality reads. The Human Reference Genome was assembled and indexed using  
552 Homo\_sapiens.GRCh38.dna.primary\_assembly.fa and Homo\_sapiens.GRCh38.104.gtf from  
553 Ensembl using the genomeGenerate run mode in STAR(59). The filtered reads were then aligned  
554 to the generated genome using STAR. HTSeq(60) was used to count the aligned reads in each

555 .bam file generated by STAR. The DESeq2 package(61) was then used to quantify differential gene  
556 expression in R(62). Differential expression was determined for each PM exposure condition  
557 relative to the counts from unexposed control cells. Significantly differentially expressed genes  
558 were defined as having a  $\log_2(\text{Fold Change}) \geq 1$  and  $p_{\text{adj}} < 0.05$ . GO Term analysis was performed  
559 using the Enrichr web tool(45) to determine GO Biological Process terms that were significantly  
560 enriched in the sets of significantly differentially expressed genes. Significant GO Terms were  
561 defined as having  $p_{\text{adj}} < 0.01$ . Chord plots were constructed using the GOplot package in R.

## 562 **Acknowledgments**

563 We acknowledge the funding support of this study from the National Institutes of Health  
564 R21ES032124 (L.M.C.) and U01AG060903 (J.M.P.), the National Science Foundation EF-2022124  
565 (L.M.C.), and The Johns Hopkins University Older Americans Independence Center of the National  
566 Institute on Aging (NIA) under award number P30AG021334 (JMP). This work is supported by the  
567 National Science Foundation Graduate Research Fellowship Program under Grant No. DGE  
568 2137420 (S.M.E.). Any opinions, findings, and conclusions or recommendations expressed in this  
569 material are those of the authors and do not necessarily reflect the views of the National Science  
570 Foundation. The authors acknowledge the Texas Advanced Computing Center (TACC) at UT  
571 Austin for providing high performance computing resources. We also thank the Genomic  
572 Sequencing and Analysis Core Facility at UT Austin, RRID#: SCR\_021713, for assistance with  
573 RNA-sequencing.

574 **References**

- 575 1. G. D. Thurston, *et al.*, Ischemic heart disease mortality and long-term exposure to source-  
576 related components of U.S. fine particle air pollution. *Environ. Health Perspect.* **124**, 785–  
577 794 (2016).
- 578 2. H. S. Zahran, C. M. Bailey, S. A. Damon, P. L. Garbe, P. N. Breyse, *Vital Signs: Asthma*  
579 *in Children — United States, 2001–2016. MMWR. Morb. Mortal. Wkly. Rep.* **67**, 149–155  
580 (2018).
- 581 3. B. Brunekreef, S. T. Holgate, Air pollution and health. *Lancet* **360**, 1233–42 (2002).
- 582 4. Y. Fang, V. Naik, L. W. Horowitz, D. L. Mauzerall, Air pollution and associated human  
583 mortality: The role of air pollutant emissions, climate change and methane concentration  
584 increases from the preindustrial period to present. *Atmos. Chem. Phys.* **13**, 1377–1394  
585 (2013).
- 586 5. K. Ken Lee, M. R. Miller, A. S. V Shah, S. V Shah, Special Review Air Pollution and  
587 Stroke. *J. Stroke* **20**, 2–11 (2018).
- 588 6. X. Li, *et al.*, Association between ambient fine particulate matter and preterm birth or term  
589 low birth weight: An updated systematic review and meta-analysis. *Environ. Pollut.* **227**,  
590 596–605 (2017).
- 591 7. Health Effects Institute, State of Global Air 2020 Special Report. *Boston, MAHealth Eff.*  
592 *Inst.* (2020).
- 593 8. M. Ubaid, *et al.*, A systematic review on global pollution status of particulate matter-  
594 associated potential toxic elements and health perspectives in urban environment.  
595 *Environ. Geochemistry Heal.* **2018 413 41**, 1131–1162 (2018).
- 596 9. K.-H. Kim, E. Kabir, S. Kabir, A review on the human health impact of airborne particulate  
597 matter Human health Particle size. *Environ. Int.* **74** (2015).
- 598 10. Y. C. T. Huang, *et al.*, Comparison of Gene Expression Profiles Induced By Coarse, Fine,  
599 and Ultrafine Particulate Matter. *J. Toxicol. Environ. Health* **74**, 296–312 (2011).
- 600 11. K. R. Daellenbach, *et al.*, Sources of particulate-matter air pollution and its oxidative  
601 potential in Europe. *Nat.* **2020 5877834 587**, 414–419 (2020).
- 602 12. A. Van Donkelaar, R. V Martin, C. Li, R. T. Burnett, Regional Estimates of Chemical  
603 Composition of Fine Particulate Matter Using a Combined Geoscience-Statistical Method  
604 with Information from Satellites, Models, and Monitors. *Environ. Sci. Technol.* **53**, 2595–  
605 2611 (2019).
- 606 13. K. Cheung, *et al.*, Spatial and temporal variation of chemical composition and mass  
607 closure of ambient coarse particulate matter (PM<sub>10-2.5</sub>) in the Los Angeles area. *Atmos.*  
608 *Environ.* **45**, 2651–2662 (2011).
- 609 14. Q. Yuan, Y. Chen, X. Li, Z. Zhang, H. Chu, Ambient fine particulate matter (PM<sub>2.5</sub>)  
610 induces oxidative stress and pro-inflammatory response via up-regulating the expression  
611 of CYP1A1/1B1 in human bronchial epithelial cells in vitro. *Mutat. Res. Toxicol. Environ.*  
612 *Mutagen.* **839**, 40–48 (2019).
- 613 15. J. C. Gonzalez-Rivera, *et al.*, RNA oxidation in chromatin modification and DNA-damage  
614 response following exposure to formaldehyde. *Sci. Rep.* **10**, 1–16 (2020).

- 615 16. J. C. Gonzalez-Rivera, *et al.*, Post-transcriptional air pollution oxidation to the cholesterol  
616 biosynthesis pathway promotes pulmonary stress phenotypes. *Commun. Biol.* **3** (2020).
- 617 17. X. Li, *et al.*, CircRNA104250 and lncRNAuc001.dgp.1 promote the PM2.5-induced  
618 inflammatory response by co-targeting miR-3607-5p in BEAS-2B cells. *Environ. Pollut.*  
619 **258**, 113749 (2020).
- 620 18. K. Kaur, *et al.*, Comparison of biological responses between submerged, pseudo-air-liquid  
621 interface, and air-liquid interface exposure of A549 and differentiated THP-1 co-cultures to  
622 combustion-derived particles HHS Public Access. *J. Env. Sci Heal. A Tox Hazard Subst*  
623 *Env. Eng* **57**, 540–551 (2022).
- 624 19. S. Offer, *et al.*, Effect of Atmospheric Aging on Soot Particle Toxicity in Lung Cell Models  
625 at the Air–Liquid Interface: Differential Toxicological Impacts of Biogenic and  
626 Anthropogenic Secondary Organic Aerosols (SOAs). *Environ. Health Perspect.* **130**  
627 (2022).
- 628 20. Y. N. H. Escobar, *et al.*, Differential responses to e-cig generated aerosols from  
629 humectants and different forms of nicotine in epithelial cells from nonsmokers and  
630 smokers. *Am. J. Physiol. - Lung Cell. Mol. Physiol.* **320**, L1064–L1073 (2021).
- 631 21. Y. Zou, C. Jin, Y. Su, J. Li, B. Zhu, Water soluble and insoluble components of urban  
632 PM2.5 and their cytotoxic effects on epithelial cells (A549) in vitro. *Environ. Pollut.* **212**,  
633 627–635 (2016).
- 634 22. A. Lai, J. Baumgartner, J. J. Schauer, Y. Rudich, M. Pardo, Cytotoxicity and chemical  
635 composition of women’s personal PM2.5 exposures from rural China. *Environ. Sci.* **1**, 359  
636 (2021).
- 637 23. W. Zou, *et al.*, PM2.5 Induces Airway Remodeling in Chronic Obstructive Pulmonary  
638 Diseases via the Wnt5a/ $\beta$ -Catenin Pathway. *Int. J. Chron. Obstruct. Pulmon. Dis.* **16**, 3285  
639 (2021).
- 640 24. M. Gualtieri, *et al.*, Differences in cytotoxicity versus pro-inflammatory potency of different  
641 PM fractions in human epithelial lung cells. *Toxicol. Vitro.* (2010)  
642 <https://doi.org/10.1016/j.tiv.2009.09.013>.
- 643 25. J. Park, *et al.*, The impact of organic extracts of seasonal PM 2.5 on primary human lung  
644 epithelial cells and their chemical characterization. *Environ. Sci. Pollut. Res.* **28** (2021).
- 645 26. N. Li, *et al.*, Ultrafine particulate pollutants induce oxidative stress and mitochondrial  
646 damage. *Environ. Health Perspect.* **111**, 455–460 (2003).
- 647 27. M. T. Montgomery, *et al.*, Genome-wide analysis reveals mucociliary remodeling of the  
648 nasal airway epithelium induced by urban PM2.5. *Am. J. Respir. Cell Mol. Biol.* **63**, 172–  
649 184 (2020).
- 650 28. G. E. Neurohr, *et al.*, Excessive Cell Growth Causes Cytoplasm Dilution And Contributes  
651 to Senescence. *Cell* **176**, 1083-1097.e18 (2019).
- 652 29. M. Haghghi, J. C. Caicedo, B. A. Cimini, A. E. Carpenter, S. Singh, High-dimensional  
653 gene expression and morphology profiles of cells across 28,000 genetic and chemical  
654 perturbations. *Nat. Methods* **2022** *1912* **19**, 1550–1557 (2022).
- 655 30. G. P. Way, *et al.*, Predicting cell health phenotypes using image-based morphology  
656 profiling. *Mol. Biol. Cell* **32**, 995–1005 (2021).



- 657 31. G. P. Way, *et al.*, Morphology and gene expression profiling provide complementary  
658 information for mapping cell state. *Cell Syst.* **13**, 911-923.e9 (2022).
- 659 32. J. M. Phillip, *et al.*, Biophysical and biomolecular determination of cellular age in humans.  
660 *Nat. Biomed. Eng.* **2017 17 1**, 1–12 (2017).
- 661 33. I. Heckenbach, *et al.*, Nuclear morphology is a deep learning biomarker of cellular  
662 senescence. *Nat. Aging* **2022 28 2**, 742–755 (2022).
- 663 34. A. Venosa, Senescence in Pulmonary Fibrosis: Between Aging and Exposure. *Front. Med.*  
664 **7**, 829 (2020).
- 665 35. M. Ursínyová, V. Hladíková, Chapter 3 Cadmium in the environment of Central Europe.  
666 *Trace Met. Environ.* **4**, 87–107 (2000).
- 667 36. B. A. M. Bandowe, H. Meusel, Nitrated polycyclic aromatic hydrocarbons (nitro-PAHs) in  
668 the environment – A review. *Sci. Total Environ.* **581–582**, 237–257 (2017).
- 669 37. T. M. C. M. De Kok, H. A. L. Drieste, J. G. F. Hogervorst, J. J. Briedé, Toxicological  
670 assessment of ambient and traffic-related particulate matter: A review of recent studies.  
671 *Mutat. Res.* **613**, 103–122 (2006).
- 672 38. S. C. Faber, N. A. McNabb, P. Ariel, E. R. Aungst, S. D. McCullough, Exposure Effects  
673 Beyond the Epithelial Barrier: Transepithelial Induction of Oxidative Stress by Diesel  
674 Exhaust Particulates in Lung Fibroblasts in an Organotypic Human Airway Model. *Toxicol.*  
675 *Sci.* **177**, 140 (2020).
- 676 39. L. J. Kuo, L. X. Yang,  $\gamma$ -H2AX - A Novel Biomarker for DNA Double-strand Breaks. *In Vivo*  
677 (*Brooklyn*). **22**, 305–309 (2008).
- 678 40. Q. Yuan, *et al.*, METTL3 regulates PM2.5-induced cell injury by targeting OSGIN1 in  
679 human airway epithelial cells. *J. Hazard. Mater.* **415**, 125573 (2021).
- 680 41. B. K. Lohman, J. N. Weber, D. I. Bolnick, Evaluation of TagSeq, a reliable low-cost  
681 alternative for RNAseq. *Mol. Ecol. Resour.* **16**, 1315–1321 (2016).
- 682 42. E. Meyer, G. V. Aglyamova, M. V. Matz, Profiling gene expression responses of coral  
683 larvae (*Acropora millepora*) to elevated temperature and settlement inducers using a novel  
684 RNA-Seq procedure. *Mol. Ecol.* **20**, 3599–3616 (2011).
- 685 43. J. Hukkanen, O. Pelkonen, J. Hakkola, H. Raunio, Expression and Regulation of  
686 Xenobiotic-Metabolizing Cytochrome P450 (CYP) Enzymes in Human Lung. *Crit. Rev.*  
687 *Toxicol.* **32**, 391–411 (2008).
- 688 44. H. A. Sikder, M. K. Devlin, S. Dunlap, B. Ryu, R. M. Alani, Id proteins in cell growth and  
689 tumorigenesis. *Cancer Cell* **3**, 525–530 (2003).
- 690 45. M. V. Kuleshov, *et al.*, Enrichr: a comprehensive gene set enrichment analysis web server  
691 2016 update. *Nucleic Acids Res.* **44**, W90–W97 (2016).
- 692 46. P. H. Wu, *et al.*, Evolution of cellular morpho-phenotypes in cancer metastasis. *Sci. Rep.* **5**  
693 (2015).
- 694 47. V. S. Tanwar, X. Zhang, L. Jagannathan, C. C. Jose, S. Cuddapah, Cadmium exposure  
695 upregulates SNAIL through miR-30 repression in human lung epithelial cells. *Toxicol.*  
696 *Appl. Pharmacol.* **373**, 1–9 (2019).

- 697 48. I. M. Attafi, S. A. Bakheet, H. M. Korashy, The role of NF- $\kappa$ B and AhR transcription factors  
698 in lead-induced lung toxicity in human lung cancer A549 cells. *Toxicol. Mech. Methods* **30**,  
699 197–207 (2020).
- 700 49. C. Stringer, T. Wang, M. Michaelos, M. Pachitariu, Cellpose: a generalist algorithm for  
701 cellular segmentation. *Nat. Methods* 2020 181 **18**, 100–106 (2020).
- 702 50. A. Zaritsky, *et al.*, Interpretable deep learning uncovers cellular properties in label-free live  
703 cell images that are predictive of highly metastatic melanoma. *Cell Syst.* **12**, 733-747.e6  
704 (2021).
- 705 51. Z. Wu, *et al.*, DynaMorph: self-supervised learning of morphodynamic states of live cells.  
706 *Mol. Biol. Cell* **33** (2022).
- 707 52. J. M. Phillip, *et al.*, Fractional re-distribution among cell motility states during ageing.  
708 *Commun. Biol.* 2021 41 **4**, 1–9 (2021).
- 709 53. J. M. Phillip, K. S. Han, W. C. Chen, D. Wirtz, P. H. Wu, A robust unsupervised machine-  
710 learning method to quantify the morphological heterogeneity of cells and nuclei. *Nat.*  
711 *Protoc.* 2021 162 **16**, 754–774 (2021).
- 712 54. R. J. Delfino, N. Staimer, N. D. Vaziri, Air pollution and circulating biomarkers of oxidative  
713 stress. *Air Qual. Atmos. Heal.* **4**, 37–52 (2011).
- 714 55. R. Kumar, A. Saneja, A. K. Panda, Chapter 17 An Annexin V-FITC-Propidium Iodide-  
715 Based Method for Detecting Apoptosis in a Non-Small Cell Lung Cancer Cell Line.  
716 *Methods Mol. Biol.* **2279**, 213–223 (2021).
- 717 56. L. C. Crowley, B. J. Marfell, A. P. Scott, N. J. Waterhouse, Quantitation of apoptosis and  
718 necrosis by annexin V binding, propidium iodide uptake, and flow cytometry. *Cold Spring*  
719 *Harb. Protoc.* **2016**, 953–957 (2016).
- 720 57. D. R. Stirling, *et al.*, CellProfiler 4: improvements in speed, utility and usability. *BMC*  
721 *Bioinformatics* **22**, 1–11 (2021).
- 722 58. L. McInnes, J. Healy, J. Melville, UMAP: Uniform Manifold Approximation and Projection  
723 for Dimension Reduction. *arXiv* (2020).
- 724 59. A. Dobin, *et al.*, STAR: ultrafast universal RNA-seq aligner. *Bioinformatics* **29**, 15 (2013).
- 725 60. S. Anders, P. T. Pyl, W. Huber, HTSeq—a Python framework to work with high-throughput  
726 sequencing data. *Bioinformatics* **31**, 166–169 (2015).
- 727 61. M. I. Love, W. Huber, S. Anders, Moderated estimation of fold change and dispersion for  
728 RNA-seq data with DESeq2. *Genome Biol.* **15** (2014).
- 729 62. R. C. Team, R: A language and environment for statistical computing (2016).
- 730

## Figures and Tables

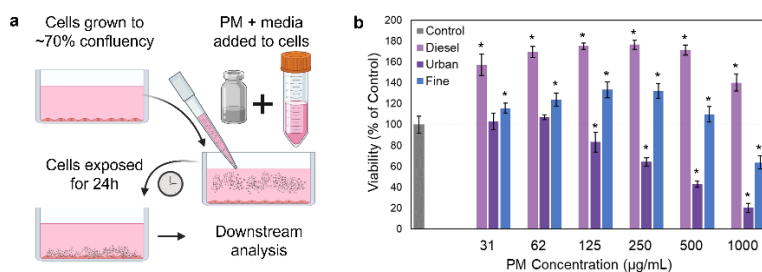

**Figure 1.** Effects of particulate matter (PM) exposure on cell viability. **(a)** Graphical depiction of submerged PM exposure method. **(b)** Cell viability following 24h exposures to different PM types and concentrations. Values are percentages of viable cells relative to unexposed control cells as measured with the alamarBlue assay (n=7, error bars represent one standard deviation, \* =  $p < 0.05$  using Student's T-test).

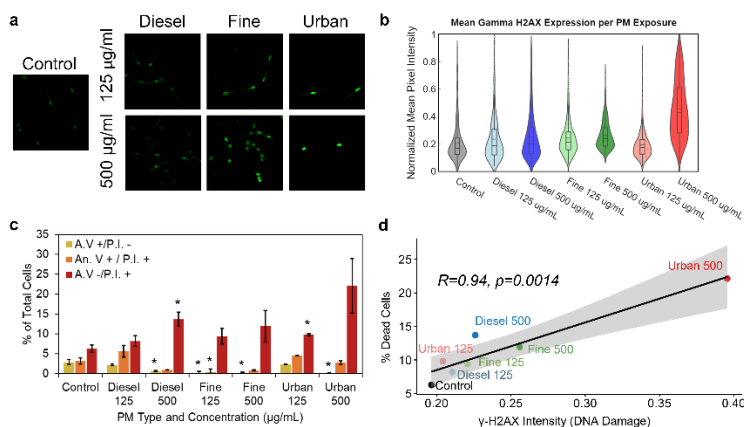

**Figure 2.** PM exposure leads to alteration of apoptotic levels and DNA damage. **(a)** Representative images of the immunofluorescent staining of  $\gamma$ H2AX across different exposure conditions. **(b)** Violin plots overlaid with box and whisker plots showing the distribution of average  $\gamma$ H2AX intensity values for cell nuclei in each exposure condition. **(c)** Flow cytometry analysis of Annexin V-Propidium Iodide apoptosis assay following PM exposure. A.V+/P.I.- and A.V+/P.I.+ represent early- and late-stage apoptotic cells respectively, A.V-/P.I.+ represents dead cells ( $n=3, \geq 10,000$  cells per measurement, error bars represent the standard error of the mean, \* =  $p < 0.05$ ). The remaining cells in each condition were healthy (A.V-/P.I.-). **(d)** Correlation between percentage of dead cells from the apoptosis assay shown in **(a)** and the average  $\gamma$ H2AX intensity following PM exposure. Gray shading represents a 95% confidence interval.

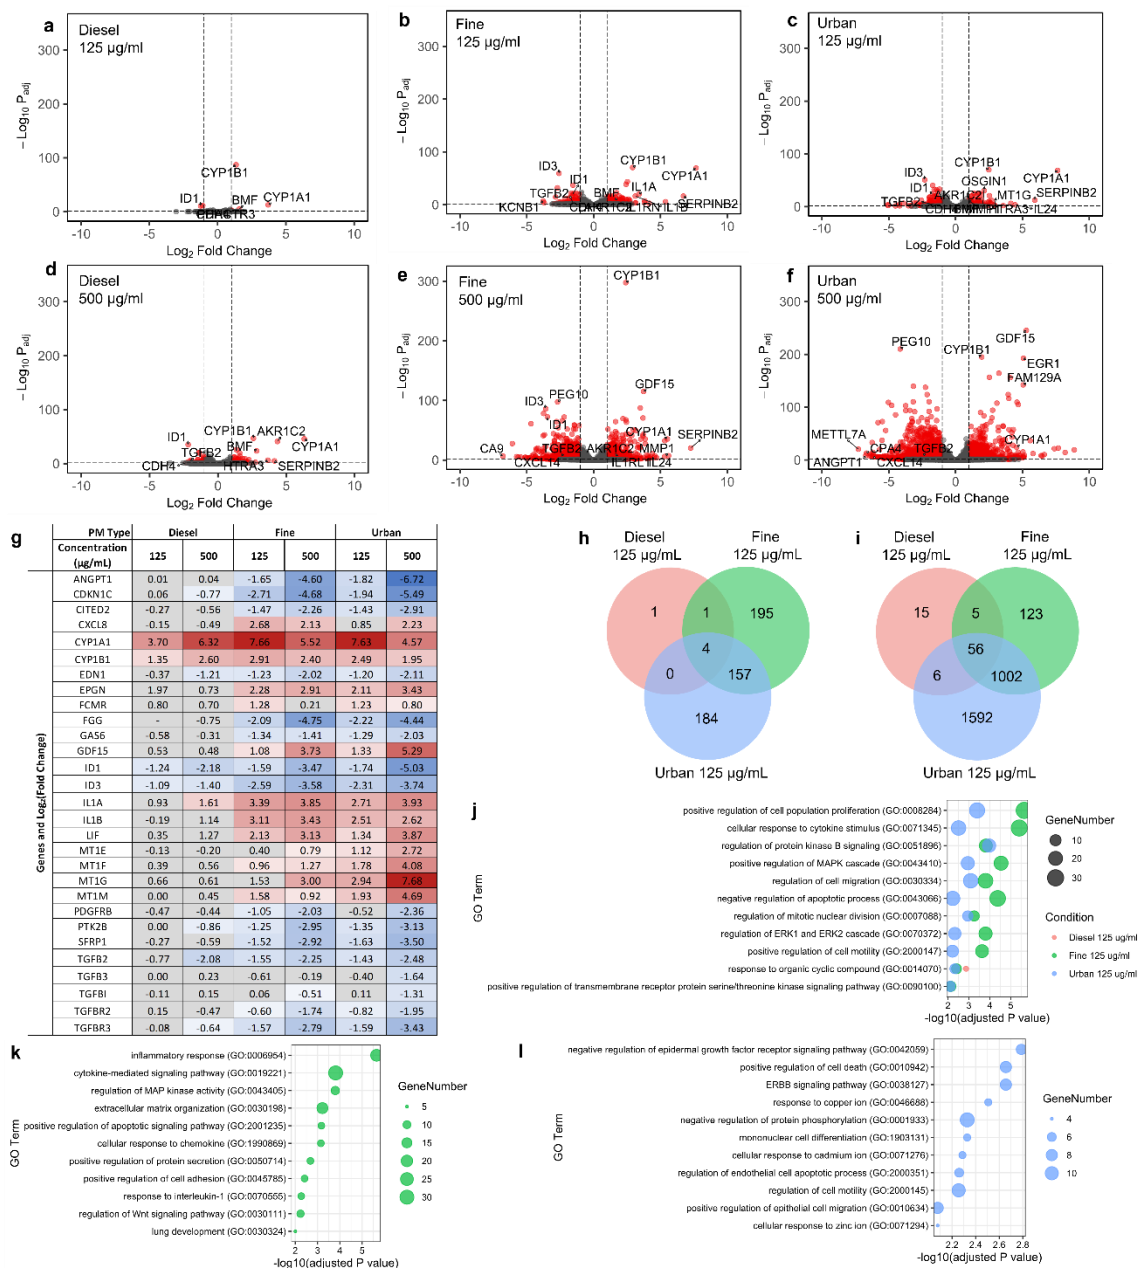

**Figure 3.** Transcriptomic analysis of particulate matter stress reveals unique network remodeling. **(a-f)** Volcano plots showing significantly differentially expressed (DE) genes (red =  $\text{Log}_2\text{FC} > 1$ ,  $p_{\text{adj}} < 0.05$ ) relative to control cells after exposure to Diesel, Fine and Urban PM at 125µg/mL **(a-c)** and 500µg/mL **(d-f)** for 24 hours. **(g)**  $\text{Log}_2\text{Fold}$  Changes in expression of select genes. A grey background indicates the expression change was not significant ( $p > 0.05$ ). **(h, i)** Venn diagrams of the significantly DE genes from each condition. Intersections represent genes that were differentially expressed in overlapping conditions. **(j-l)** Bubble plots showing select enriched Gene Ontology (GO) Biological Process terms that are commonly enriched among two or more of the low-level exposure conditions **(j)**, or unique to the low-level Fine **(k)** or Urban **(l)** exposure conditions.

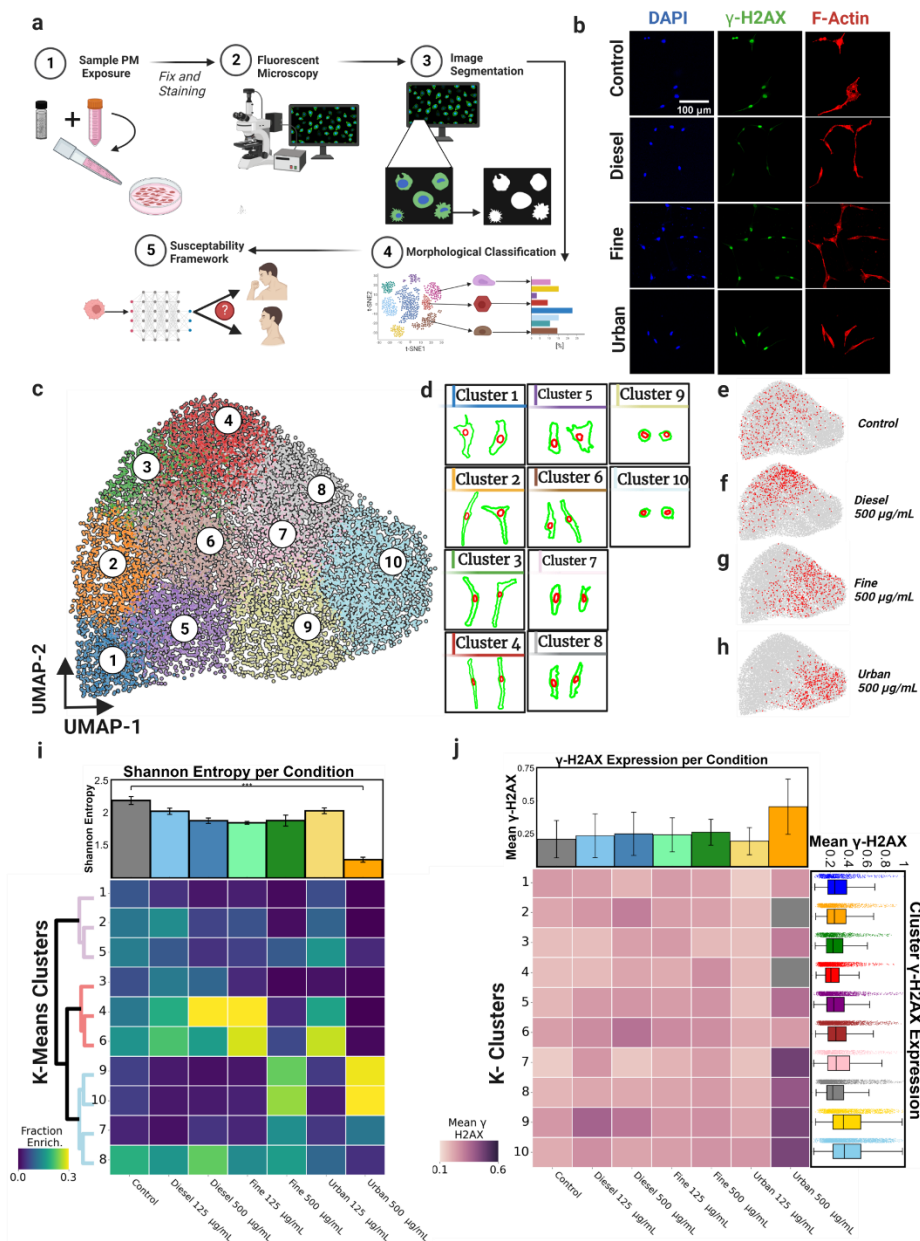

**Figure 4.** (a) Graphical depiction of morphological analysis pipeline. (b) Representative fluorescence microscopy images of cells from each condition. (c) UMAP visualization of the 33 measured morphological parameters for each cell in every condition. UMAP-1 (X-axis) was *negatively* correlated with size and UMAP-2 (Y-axis) was *positively* correlated with cell elongation, or linearity. k-means clustering was applied to cluster cells of similar morphologies. (d) Representative cellular (green) and nuclear (red) morphologies of cells from each k-means morphology cluster. (e-h) Plots showing the distribution of cells from each respective exposure condition in red within the UMAP space. (i) Heatmap displaying the enrichment in number of cells in each morphology cluster for each exposure condition. The bar graph shows the Shannon Entropy for the distribution of cell morphologies within each exposure group. The dendrogram identifies clusters with similar morphological features. (f) Heatmap displaying the mean  $\gamma$ H2AX in morphology clusters across all exposure conditions. Mean  $\gamma$ H2AX intensity across each exposure condition (top).  $\gamma$ H2AX intensity of all cells within each k-means cluster (right).

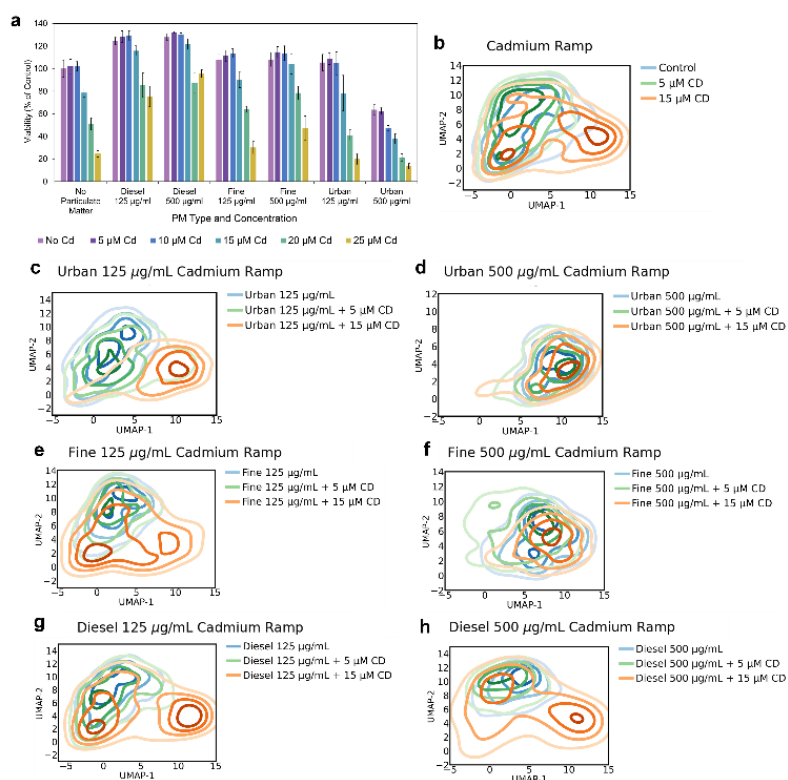

**Figure 5.** (a) Cell viability following 24h exposures to different PM types and concentrations supplemented with cadmium chloride (0-25 µM Cd). Values are percentages of viable cells relative to unexposed control cells as measured with the alamarBlue assay (n=6, error bars represent one standard deviation). (b-h) Morphological distribution of cells from each respective exposure condition with CdCl<sub>2</sub> supplementation displayed across the UMAP space.

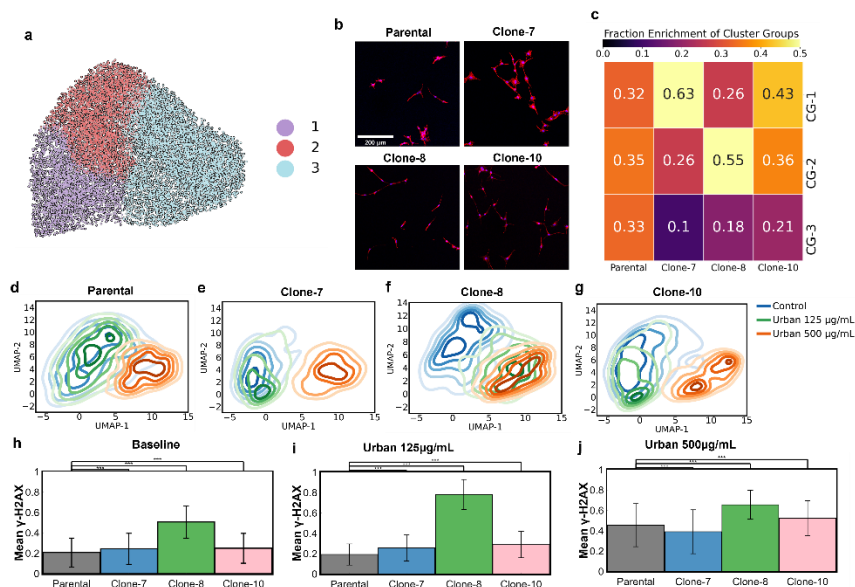

**Figure 6.** Morphology encodes susceptibility to particulate matter exposure. **(a,b)** The 10 k-means clusters that are used to define cell morphology can be further grouped into 3 cluster groups (CG1-3) using hierarchical clustering. **(c)** Clonal populations show enrichment in different morphological cluster groups. The distributions of cell morphologies differ for each clone and the parent cell population from which the clones were derived. **(d-g)** Upon exposure to Urban PM, clones with unique baseline morphologies show different shifts in morphology. **(h-j)** Average  $\gamma$ H2AX intensity values in cell nuclei for populations in each exposure condition.



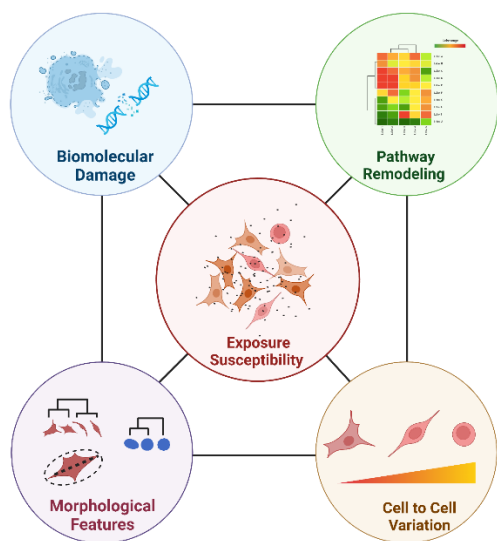

**Figure 7.** Morphology encodes susceptibility and is dependent upon the interplay between molecular changes in cells.

**Table 1.** Select compositional differences between PM types, as reported by NIST in mg per kg of total particulate matter mass. No cadmium or lead concentrations were reported for SRM 2975.

| <b>Units:<br/>mg/kg</b> | <b>Urban<br/>PM mass<br/>fraction</b> | <b>Fine PM<br/>mass<br/>fraction</b> | <b>Diesel<br/>Exhaust<br/>mass<br/>fraction</b> |
|-------------------------|---------------------------------------|--------------------------------------|-------------------------------------------------|
| Cadmium                 | 73.7                                  | 4.34                                 | -                                               |
| Lead                    | 6550                                  | 286                                  | -                                               |
| Nitro-PAHs              | 0.73962                               | 0.99598                              | 45.907                                          |
